# Supplementary material
Source: Frontiers journal article supplement (https://www.frontiersin.org/articles/158301)

**Supplementary material**

**Figure S2.** Nonmetric multidimensional scaling (nMDS) plots of bacterial community structure from *Didemnum fulgens* and ambient seawater. nMDS ordination based on Bray-Curtis similarity of T-RFLP profiles for (A) *HaeIII*, and (B) *MspI* data sets. Stress values for two-dimensional ordination are shown in the upper right corner of the graph. Continuous circles encompass data for *D. fulgens*, dashed circles for seawater samples. PERMANOVA p (perm) = 0.001 for both restriction enzymes; PERMDISP p (perm) = 0.096 for *HaeIII* and p (perm) = 0.001 for *MspI*.

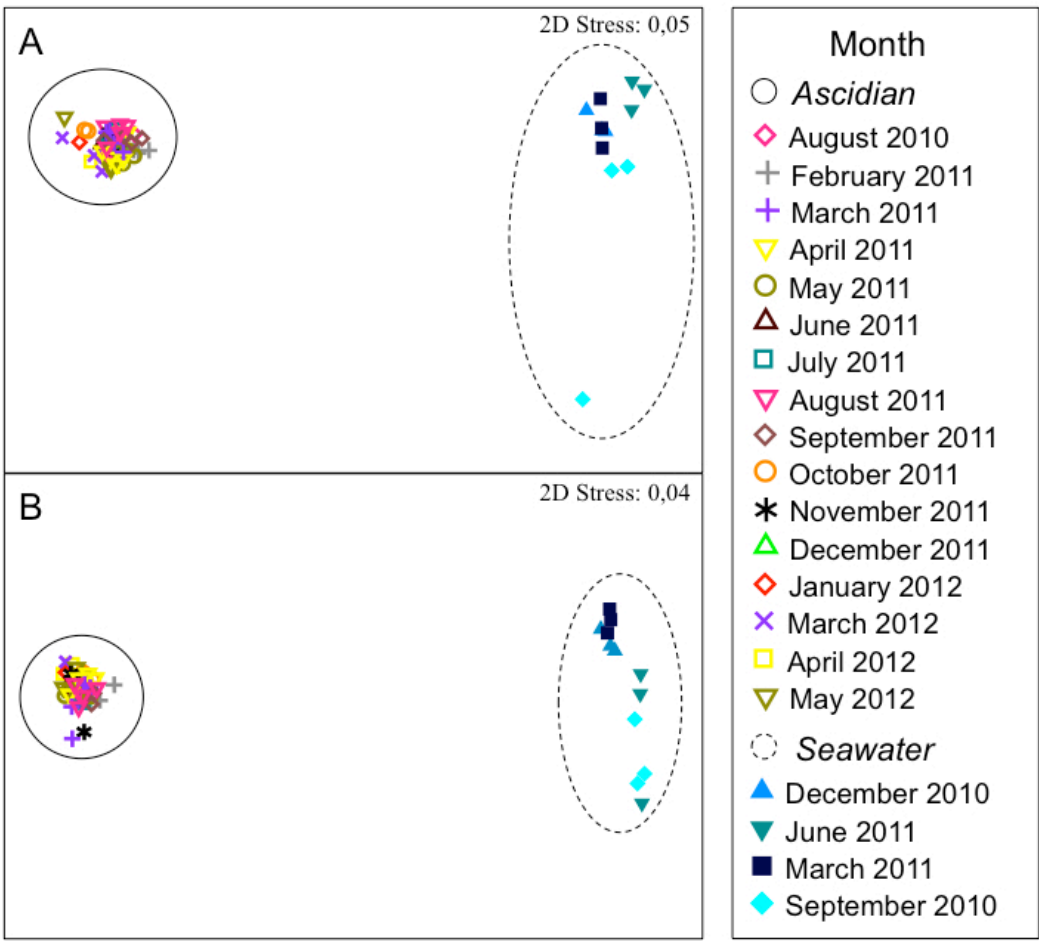

Supplement: Image_2.PDF [file Image_2.PDF]
